# Supplementary material for: Foxp1 and Lhx1 Coordinate Motor Neuron Migration with Axon Trajectory Choice by Gating Reelin Signalling
Source: PLoS Biol. 2010 Aug 10;8(8):e1000446. doi: 10.1371/journal.pbio.1000446 (PMC2919418; doi:10.1371/journal.pbio.1000446)
Supplement: Table S3 — Position of LMC neurons in electroporated chick embryos. n: number of embryos analysed; N: total numbers of neurons counted; p values for position of experimental versus control neurons are from randomized Hotelling's T2 test under unequal variances. a Values are ± standard deviation of the mean; b only electroporated, LacZ+, or GFP+ LMC neurons were included in the analysis; c only electroporated LacZ+ Lhx1/2− LMC neurons were included in the analysis. (0.06 MB DOC) [file pbio.1000446.s013.doc]

|  | **LMCm** | | | | | | **LMCl** | | | | | | |
| --- | --- | --- | --- | --- | --- | --- | --- | --- | --- | --- | --- | --- | --- |
| **Plasmids electroporated** | **ML[%]a** | **DV[%]a** | **n** | **N** | **N/embryo** | **p** | **ML[%]a** | **DV[%]a** | **n** | **N** | **N/embryo** | **p** |  |
| LacZb | 58.62.9 | 50.85.5 | 7 | 299 | 42.721.9 |  | 78.33.3 | 453.4 | 7 | 522 | 74.626.6 |  |  |
| Dab15YF +LacZb | 58.13.3 | 50.27.8 | 7 | 378 | 5420.1 | 0.9235 | 72.13.6 | 42.28 | 7 | 595 | 8529.2 | 0.0233 |  |
| GFPb | 67.42.2 | 58.94.2 | 4 | 101 | 25.318 |  | 83.53.1 | 52.24.5 | 4 | 154 | 38.525.9 |  |  |
| Dab1::GFPb | 70.22.4 | 49.13.6 | 5 | 178 | 35.66.3 | 0.0165 | 84.21.3 | 536 | 5 | 168 | 33.64 | 0.9019 |  |
| LacZc | 63.51.8 | 56.93.8 | 4 | 333 | 70.78 |  | n.a. | n.a. | n.a. | n.a. | n.a. | n.a. |  |
| [Isl1]siRNA+ LacZc | 67.91.5 | 536.1 | 3 | 322 | 68.58 | 0.0473 | n.a. | n.a. | n.a. | n.a. | n.a. | n.a. |  |
